# Supplementary material
Source: HighWire-hosted journal article supplement (https://jnm.snmjournals.org/highwire/filestream/94210/field_highwire_adjunct_files/0/jnm085613_Supplemental_Data.pdf)
Supplement: jnm085613_Supplemental_Data.pdf [file jnm085613_Supplemental_Data.pdf]

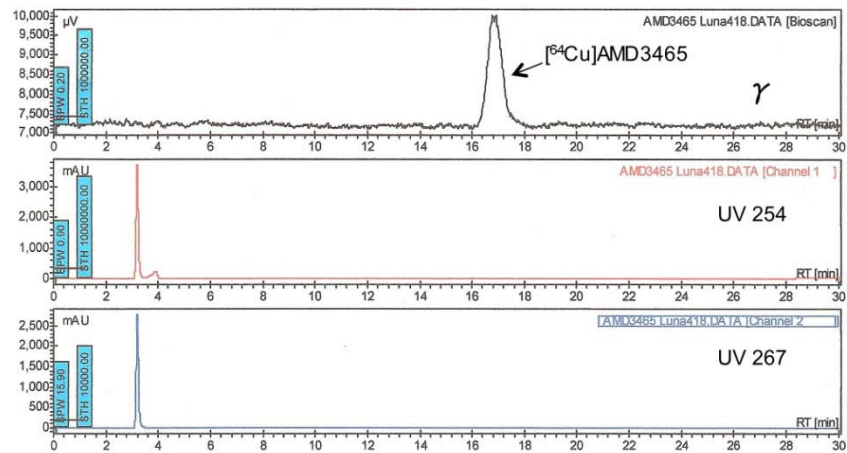

Supplemental Figure 1. HPLC chromatogram of  $[^{64}\text{Cu}]\text{AMD3465}$ .

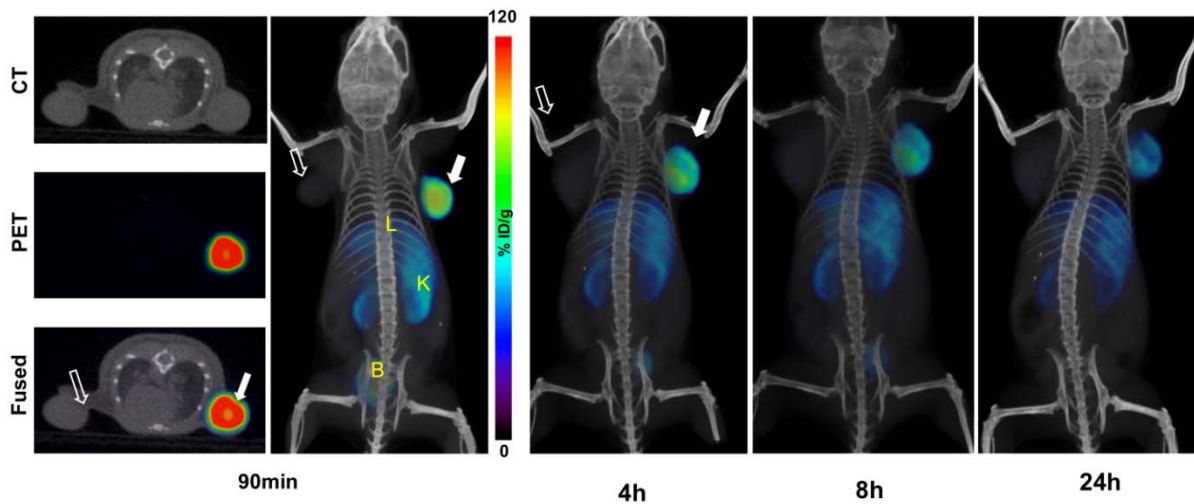

**Supplemental Figure 2. PET/CT imaging of CXCR4 expression in subcutaneous brain tumor xenografts with [ $^{64}\text{Cu}$ ]AMD3465.** NOD/SCID mice bearing U87 and U87-stb-CXCR4 glioblastoma xenografts on the left and right flanks, respectively, were given approximately 9.25 MBq (250  $\mu\text{Ci}$ ) of  $^{64}\text{Cu}$ -labeled radiotracers *via* tail vein injection and PET/CT images were acquired. **A**, representative transaxial PET, CT and fused sections of both the tumors from a [ $^{64}\text{Cu}$ ]AMD3465 injected mouse at 90 min post-injection; **B**, volume rendered whole body images of [ $^{64}\text{Cu}$ ]AMD3465 at 90 min, 4h and 8h and 24 h post injection. All images were decay corrected and scaled to the same maximum threshold value. Unfilled arrow, U87 tumor; solid arrow, U87-stb-CXCR4 tumor; L, liver; K, kidney; B, bladder.

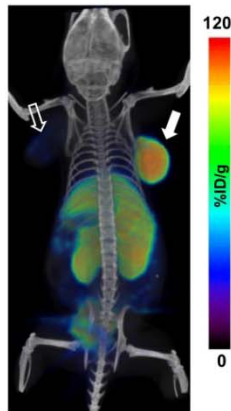

**Supplemental Figure 3. PET/CT imaging of CXCR4 expression in subcutaneous brain tumor xenografts with [<sup>64</sup>Cu]AMD3465.** NOD/SCID mice bearing U87 and U87-stb-CXCR4 glioblastoma xenografts on the left and right flanks, respectively, were given approximately 9.25 MBq (250  $\mu$ Ci) of <sup>64</sup>Cu-labeled radiotracers *via* tail vein injection and PET/CT images were acquired. Volume rendered whole body image of [<sup>64</sup>Cu]AMD3465 at 90 min post injection on a low %ID/g scale. Unfilled arrow, U87 tumor; solid arrow, U87-stb-CXCR4 tumor; L, liver; K, kidney; B, bladder.
